# Supplementary material
Source: MDPI journal article supplement (https://www.mdpi.com/2073-4441/13/9/1219)

## Supplementary Materials:

# Fabrication of manganese-supported activated alumina adsorbent for defluoridation of water: A kinetics and thermodynamics study

Kun You<sup>1</sup>, Peijie Li<sup>2</sup>, Jinxiang Fu<sup>1,\*</sup>, Ning Kang<sup>1</sup>, Yujia Gao<sup>1</sup>, Xiaoxiang Cheng<sup>2</sup>, Yuehong Yang<sup>3</sup> and Furui Yu<sup>3</sup>

<sup>1</sup> School of Municipal and Environmental Engineering, Shenyang Jianzhu University, Shenyang, 110168, P.R. China

<sup>2</sup> School of Municipal and Environmental Engineering, Shandong Jianzhu University, Jinan, 250101, P.R. China

<sup>3</sup> Shandong Urban Construction Vocational College, Jinan, 250103, P.R. China

\* Correspondence: author: fujinxiang@sina.com (Jinxiang Fu).

**Table S1.** Comparative analysis of fluoride removal methods.

| Adsorbents         | Fluoride effluent concentration (mg/L) | Fluoride removal rate (%) | Adsorption capacity (mg/g) |
|--------------------|----------------------------------------|---------------------------|----------------------------|
| MnOOH-supported AA | 1.75                                   | 67.75                     | 0.55                       |
| AA                 | 3.49                                   | 37.72                     | 0.3                        |

**Figure S1.** Distribution of areas with excessive fluoride and iron in groundwater in China, fluoride exceeded area (a) and iron exceeded area (b).

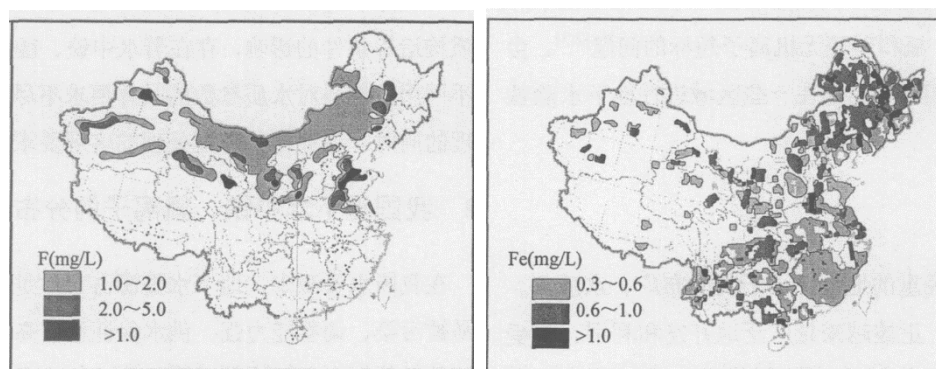

**Figure S2.** Effect of pH on fluoride removal efficiency ( $\Phi$  0.5-1.5 mm).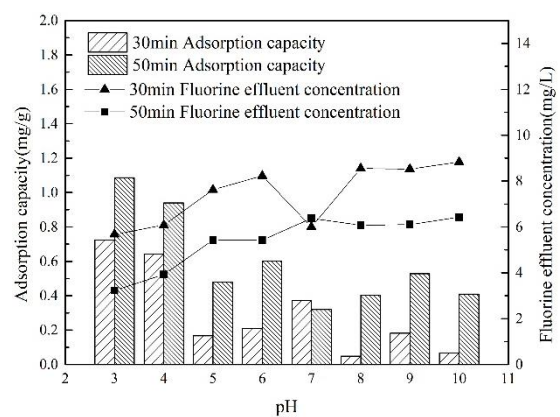

Supplement: s1 [file s1]
